# Supplementary material
Source: publisher figshare collection journal article supplement (https://acs.figshare.com/ndownloader/files/5322196)
Supplement: Supplementary file 1 [file 5322196]

# Supporting Information for: Nanofocusing of Hyperbolic Phonon-Polaritons in a Tapered Boron Nitride Slab

*Alexey Yu. Nikitin<sup>1,2\*†</sup>, Edward Yoxall<sup>1†</sup>, Martin Schnell<sup>1,3</sup>, Saül Vélez<sup>1</sup>, Irene Dolado<sup>1</sup>,  
Pablo Alonso-Gonzalez<sup>1,4</sup>, Felix Casanova<sup>1,2</sup>, Luis E. Hueso<sup>1,2</sup> and Rainer  
Hillenbrand<sup>1,5\*</sup>*

<sup>1</sup>CIC nanoGUNE, 20018, Donostia-San Sebastián, Spain.

<sup>2</sup>IKERBASQUE, Basque Foundation for Science, 48011 Bilbao, Spain.

<sup>3</sup>Beckman Institute for Advanced Science and Technology, University of Illinois,  
61801, Urbana-Champaign, Illinois, USA

<sup>4</sup>Departamento de Física, Universidad de Oviedo, 33007 Oviedo, Spain

<sup>5</sup>CIC NanoGUNE and UPV/EHU, 20018, Donostia-San Sebastian, Spain

\*Email: [a.nikitin@nanogune.eu](mailto:a.nikitin@nanogune.eu), [r.hillenband@nanogune.eu](mailto:r.hillenband@nanogune.eu)

In this document, we provide three additional figures . Fig S1 illustrates the reflection, transmission and out-of-plane scattering of the fundamental HPP mode propagating along the tapered h-BN slab. Fig. 2S shows the convergence of the numeric simulations for the field enhancement. Fig. 3S illustrates the nanofocusing of HPPs for the taper angle of 8°.

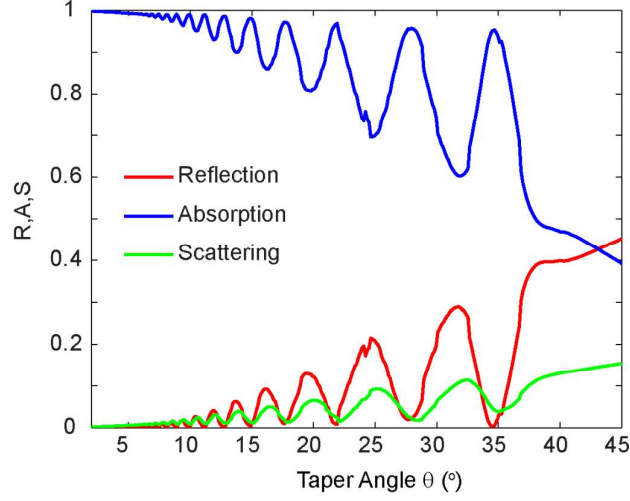

Fig S1. Reflection,  $R$  (red curve), absorption,  $A$  (blue curve), and out-of-plane scattering,  $S=I-A-R$  (green curve), coefficients for the M0 mode propagating along the tapered h-BN film, as a function of the tapering angle,  $\theta$ . The parameters of the simulation correspond to the tapered h-BN film in Fig. 3a. All three curve show oscillatory behavior (especially for large values of  $\theta$ ) due to the interference caused by the reflections of the higher-order HPP modes (composing the HPP rays) from the taper. These higher-order modes are generated by the sharp corners of the taper, as seen in Fig. 3c.

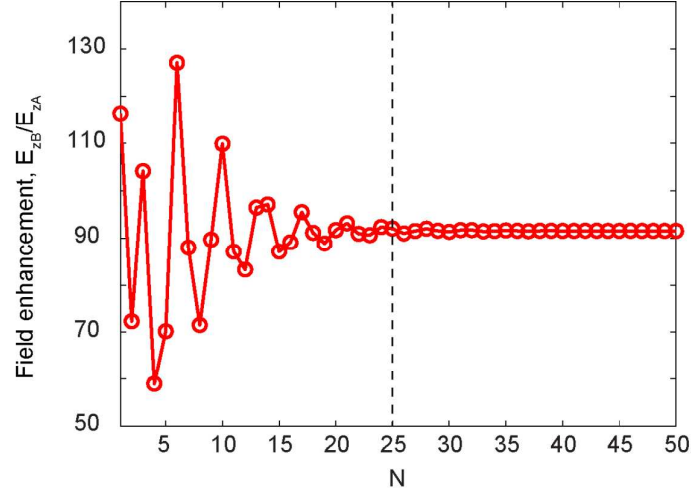

Fig S2. Field enhancement (defined in Fig. 3a), as a function of the mesh discretization, showing convergence.  $N$  is related to the maximal size of the mesh elements,  $\Delta$ , in the h-BN taper region as  $\Delta = D/N$ , where  $D$  presents the reference distance,  $D = 50$  nm. The calculation corresponds to the parameters used in Fig. 3a, at the taper angle  $\theta = 27.5^\circ$ , providing the maximum of the field enhancement. The vertical dashed line indicates the value  $N$  corresponding to the mesh used for Fig. 3a, i.e.  $\Delta = 2$  nm.

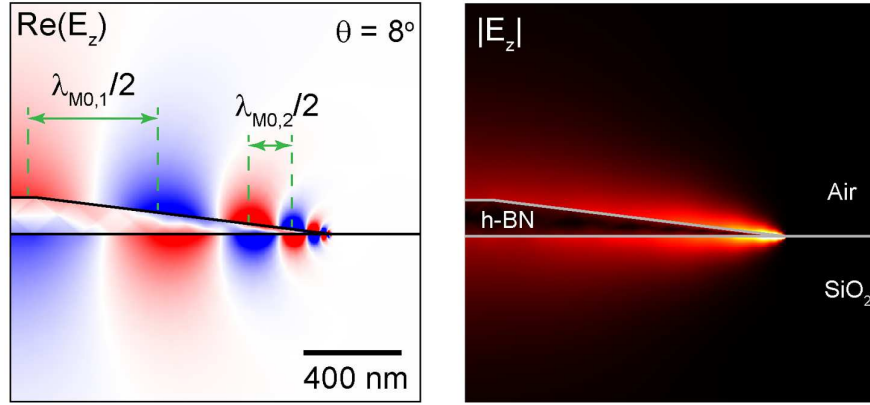

Fig S3. Nanofocusing of HPP accompanying both the field enhancement and wavelength compression. Left and right panels show the spatial distribution of  $\text{Re}(E_z)$  and  $|E_z|$ , respectively. The taper angle  $\theta = 8^\circ$ . The rest of the parameters is the same as in Fig. 3b,c. In the left panel the green arrows show the difference between the local wavelengths  $\lambda_{M0,1}$  and  $\lambda_{M0,2}$  of the compressed M0 HPP along the taper.
